# Supplementary material
Source: publisher figshare collection journal article supplement (https://gsajournals.figshare.com/articles/dataset/_/14176631)
Supplement: Supplementary file 1 [file 1]

**Supplemental Movie 1:** *sir1Δ* cells exhibited heritable epigenetic states at *HML* and *HMR*. Cells were grown on CSM solid medium and monitored by fluorescence microscopy (JRY12861). Images represent overlays between bright-field and the GFP channel, RFP channel, or both the GFP and RFP channel. Scale bar, 5μm.

**Supplemental Movie 2:** *sir2-G436D* cells exhibited heritable epigenetic states at *HML* and *HMR*. Cells were grown on CSM solid medium and monitored by fluorescence microscopy (JRY12564). Images represent overlays between bright-field and the GFP channel, RFP channel, or both the GFP and RFP channel. Scale bar, 5μm.

**Supplemental Movie 3:** *sir2-G436D, fob1Δ* cells exhibited heritable epigenetic states at *HML* and *HMR*. Cells were grown on CSM solid medium and monitored by fluorescence microscopy (JRY12901). Images represent overlays between bright-field and the GFP channel, RFP channel, or both the GFP and RFP channel. Scale bar, 5μm.
