# Supplementary material
Source: publisher figshare collection journal article supplement (https://gsajournals.figshare.com/articles/dataset/_/14176631)
Supplement: Supplementary file 1 [file 1]

## Sheet: Table S1
Table S1. Strains used in this study
Strain Number	MAT	Genotype	Mutant ID, where applicable
Results, part 1: sir1 alleles and characterization
FLAME strains and controls
JRY11906	α	can1-100, his3-11,15, leu2-3,112, lys2, ura3-1, TRP1, hmlα2∆::yEmRFP, hmrα2∆::yEGFP
JRY12860	α	can1-100, his3-11,15, leu2-3,112, lys2, trp1-1, ura3-1, hmlα2∆::yEmRFP, hmrα2∆::yEGFP
JRY12861	α	can1-100, his3-11,15, leu2-3,112, lys2, trp1-1, ura3-1, hmlα2∆::yEmRFP, hmrα2∆::yEGFP, sir1∆::LEU2
JRY12862	α	can1-100, his3-11,15, leu2-3,112, lys2, trp1-1, ura3-1, hmlα2∆::yEmRFP, hmrα2∆::yEGFP, sir4∆::HIS3
JRY12863	a	can1-100, his3-11,15, leu2-3,112, lys2, trp1-1, ura3-1, hmlα2∆::yEmRFP, hmrα2∆::yEGFP
JRY12864	a	can1-100, his3-11,15, leu2-3,112, lys2, trp1-1, ura3-1, hmlα2∆::yEmRFP, hmrα2∆::yEGFP, sir1∆::LEU2
JRY12865	a	can1-100, his3-11,15, leu2-3,112, lys2, trp1-1, ura3-1, hmlα2∆::yEmRFP, hmrα2∆::yEGFP, sir4∆::HIS3
Initial mutant isolates
JRY11896	α	can1-100, his3-11,15, leu2-3,112, lys2, trp1-1, ura3-1, hmlα2∆::yEmRFP, hmrα2∆::yEGFP- unkown EMS caused mutation	sir1-P23S
JRY11897	α	can1-100, his3-11,15, leu2-3,112, lys2, trp1-1, ura3-1, hmlα2∆::yEmRFP, hmrα2∆::yEGFP- unkown EMS caused mutation	sir1-R389K
JRY11901	α	can1-100, his3-11,15, leu2-3,112, lys2, trp1-1, ura3-1, hmlα2∆::yEmRFP, hmrα2∆::yEGFP- unkown EMS caused mutation	sir1-W52*
JRY11902	α	can1-100, his3-11,15, leu2-3,112, lys2, trp1-1, ura3-1, hmlα2∆::yEmRFP, hmrα2∆::yEGFP- unkown EMS caused mutation	sir1-W251*
JRY11904	α	can1-100, his3-11,15, leu2-3,112, lys2, trp1-1, ura3-1, hmlα2∆::yEmRFP, hmrα2∆::yEGFP- unkown EMS caused mutation	sir1-Q613*
JRY11905	α	can1-100, his3-11,15, leu2-3,112, lys2, trp1-1, ura3-1, hmlα2∆::yEmRFP, hmrα2∆::yEGFP- unkown EMS caused mutation	sir1-Q536*
JRY11918	α	can1-100, his3-11,15, leu2-3,112, lys2, TRP1, ura3-1, hmlα2∆::yEmRFP, hmrα2∆::yEGFP- unkown EMS caused mutation	sir1-A266*
JRY11919	α	can1-100, his3-11,15, leu2-3,112, lys2, TRP1, ura3-1, hmlα2∆::yEmRFP, hmrα2∆::yEGFP- unkown EMS caused mutation	sir1-W119*
JRY11920	α	can1-100, his3-11,15, leu2-3,112, lys2, TRP1, ura3-1, hmlα2∆::yEmRFP, hmrα2∆::yEGFP- unkown EMS caused mutation	sir1-W251*
Diploid strains for dominance testing
JRY11908	a/α	can1-100, his3-11,15, leu2-3,112, lys2, trp1-1, ura3-1, hmlα2∆::yEmRFP, hmrα2∆::yEGFP, unkown EMS caused mutation/WT	sir1-P23S
JRY11909	a/α	can1-100, his3-11,15, leu2-3,112, lys2, trp1-1, ura3-1, hmlα2∆::yEmRFP, hmrα2∆::yEGFP, unkown EMS caused mutation/WT	sir1-R389K
JRY11914	a/α	can1-100, his3-11,15, leu2-3,112, lys2, trp1-1, ura3-1, hmlα2∆::yEmRFP, hmrα2∆::yEGFP, unkown EMS caused mutation/WT	sir1-W52*
JRY11915	a/α	can1-100, his3-11,15, leu2-3,112, lys2, trp1-1, ura3-1, hmlα2∆::yEmRFP, hmrα2∆::yEGFP, unkown EMS caused mutation/WT	sir1-W251*
JRY11916	a/α	can1-100, his3-11,15, leu2-3,112, lys2, trp1-1, ura3-1, hmlα2∆::yEmRFP, hmrα2∆::yEGFP, unkown EMS caused mutation/WT	sir1-Q613*
JRY11917	a/α	can1-100, his3-11,15, leu2-3,112, lys2, trp1-1, ura3-1, hmlα2∆::yEmRFP, hmrα2∆::yEGFP, unkown EMS caused mutation/WT	sir1-Q536*
JRY11922	a/α	can1-100, his3-11,15, leu2-3,112, lys2, ura3-1, TRP1/trp1-1 hmlα2∆::yEmRFP, hmrα2∆::yEGFP, unkown EMS caused mutation/WT	sir1-A266*
JRY11923	a/α	can1-100, his3-11,15, leu2-3,112, lys2, ura3-1, TRP1/trp1-1 hmlα2∆::yEmRFP, hmrα2∆::yEGFP, unkown EMS caused mutation/WT	sir1-W119*
JRY11924	a/α	can1-100, his3-11,15, leu2-3,112, lys2, ura3-1, TRP1/trp1-1 hmlα2∆::yEmRFP, hmrα2∆::yEGFP, unkown EMS caused mutation/WT	sir1-W251*
JRY11955	a/α	can1-100, his3-11,15, leu2-3,112, lys2, trp1-1, ura3-1, hmlα2∆::yEmRFP, hmrα2∆::yEGFP
Diploid strains for sir1∆ complementation
JRY11953	a/α	can1-100, his3-11,15, leu2-3,112, lys2, trp1-1, ura3-1, sir1∆::LEU2/WT hmlα2∆::yEmRFP, hmrα2∆::yEGFP, WT/unkown EMS caused mutation	sir1-P23S
JRY11954	a/α	can1-100, his3-11,15, leu2-3,112, lys2, trp1-1, ura3-1, sir1∆::LEU2/WT hmlα2∆::yEmRFP, hmrα2∆::yEGFP, WT/unkown EMS caused mutation	sir1-R389K
JRY11946	a/α	can1-100, his3-11,15, leu2-3,112, lys2, trp1-1, ura3-1, sir1∆::LEU2/WT hmlα2∆::yEmRFP, hmrα2∆::yEGFP, WT/unkown EMS caused mutation	sir1-W52*
JRY11947	a/α	can1-100, his3-11,15, leu2-3,112, lys2, trp1-1, ura3-1, sir1∆::LEU2/WT hmlα2∆::yEmRFP, hmrα2∆::yEGFP, WT/unkown EMS caused mutation	sir1-Q536*
JRY11948	a/α	can1-100, his3-11,15, leu2-3,112, lys2, ura3-1, trp1-1/TRP1, sir1∆::LEU2/WT, hmlα2∆::yEmRFP, hmrα2∆::yEGFP, WT/unkown EMS caused mutation	sir1-A266*
JRY11949	a/α	can1-100, his3-11,15, leu2-3,112, lys2, ura3-1, trp1-1/TRP1, sir1∆::LEU2/WT, hmlα2∆::yEmRFP, hmrα2∆::yEGFP, WT/unkown EMS caused mutation	sir1-W119*
JRY11950	a/α	can1-100, his3-11,15, leu2-3,112, lys2, ura3-1, trp1-1/TRP1, sir1∆::LEU2/WT, hmlα2∆::yEmRFP, hmrα2∆::yEGFP, WT/unkown EMS caused mutation	sir1-W251*
JRY11951	a/α	can1-100, his3-11,15, leu2-3,112, lys2, trp1-1, ura3-1, sir1∆::LEU2/WT hmlα2∆::yEmRFP, hmrα2∆::yEGFP, WT/unkown EMS caused mutation	sir1-W251*
JRY11952	a/α	can1-100, his3-11,15, leu2-3,112, lys2, trp1-1, ura3-1, sir1∆::LEU2/WT hmlα2∆::yEmRFP, hmrα2∆::yEGFP, WT/unkown EMS caused mutation	sir1-Q613*
JRY11956	a/α	can1-100, his3-11,15, leu2-3,112, lys2, trp1-1, ura3-1, sir1∆::LEU2/SIR1, hmlα2∆::yEmRFP, hmrα2∆::yEGFP
JRY11957	a/α	can1-100, his3-11,15, leu2-3,112, lys2, trp1-1, ura3-1, sir1∆::LEU2, hmlα2∆::yEmRFP, hmrα2∆::yEGFP
Once backcrossed mutant haploid strains
JRY11926	a	can1-100, his3-11,15, leu2-3,112, lys2, trp1-1, ura3-1, hmlα2∆::yEmRFP, hmrα2∆::yEGFP- unkown EMS caused mutation	sir1-W52*
JRY11927	α	can1-100, his3-11,15, leu2-3,112, lys2, trp1-1, ura3-1, hmlα2∆::yEmRFP, hmrα2∆::yEGFP- unkown EMS caused mutation	sir1-W52*
JRY11928	a	can1-100, his3-11,15, leu2-3,112, lys2, trp1-1, ura3-1, hmlα2∆::yEmRFP, hmrα2∆::yEGFP- unkown EMS caused mutation	sir1-W251*
JRY11929	α	can1-100, his3-11,15, leu2-3,112, lys2, trp1-1, ura3-1, hmlα2∆::yEmRFP, hmrα2∆::yEGFP- unkown EMS caused mutation	sir1-W251*
JRY11930	a	can1-100, his3-11,15, leu2-3,112, lys2, trp1-1, ura3-1, hmlα2∆::yEmRFP, hmrα2∆::yEGFP- unkown EMS caused mutation	sir1-Q613*
JRY11931	α	can1-100, his3-11,15, leu2-3,112, lys2, trp1-1, ura3-1, hmlα2∆::yEmRFP, hmrα2∆::yEGFP- unkown EMS caused mutation	sir1-Q613*
JRY11932	a	can1-100, his3-11,15, leu2-3,112, lys2, trp1-1, ura3-1, hmlα2∆::yEmRFP, hmrα2∆::yEGFP- unkown EMS caused mutation	sir1-Q536*
JRY11933	α	can1-100, his3-11,15, leu2-3,112, lys2, trp1-1, ura3-1, hmlα2∆::yEmRFP, hmrα2∆::yEGFP- unkown EMS caused mutation	sir1-Q536*
JRY11934	a	can1-100, his3-11,15, leu2-3,112, lys2, TRP1, ura3-1, hmlα2∆::yEmRFP, hmrα2∆::yEGFP- unkown EMS caused mutation	sir1-A266*
JRY11935	α	can1-100, his3-11,15, leu2-3,112, lys2, TRP1, ura3-1, hmlα2∆::yEmRFP, hmrα2∆::yEGFP- unkown EMS caused mutation	sir1-A266*
JRY11936	a	can1-100, his3-11,15, leu2-3,112, lys2, TRP1, ura3-1, hmlα2∆::yEmRFP, hmrα2∆::yEGFP- unkown EMS caused mutation	sir1-W119*
JRY11937	α	can1-100, his3-11,15, leu2-3,112, lys2, TRP1, ura3-1, hmlα2∆::yEmRFP, hmrα2∆::yEGFP- unkown EMS caused mutation	sir1-W119*
JRY11938	a	can1-100, his3-11,15, leu2-3,112, lys2, TRP1, ura3-1, hmlα2∆::yEmRFP, hmrα2∆::yEGFP- unkown EMS caused mutation	sir1-W251*
JRY11939	α	can1-100, his3-11,15, leu2-3,112, lys2, TRP1, ura3-1, hmlα2∆::yEmRFP, hmrα2∆::yEGFP- unkown EMS caused mutation	sir1-W251*
Engineered sir1 mutant alleles
JRY12565	α	can1-100, his3-11,15, leu2-3,112, lys2, trp1-1, ura3-1, hmlα2∆::yEmRFP, hmrα2∆::yEGFP, sir1-W52*	sir1-W52*
JRY12566	α	can1-100, his3-11,15, leu2-3,112, lys2, trp1-1, ura3-1, hmlα2∆::yEmRFP, hmrα2∆::yEGFP, sir1-W119*	sir1-W119*
JRY12567	α	can1-100, his3-11,15, leu2-3,112, lys2, trp1-1, ura3-1, hmlα2∆::yEmRFP, hmrα2∆::yEGFP, sir1-A266T	sir1-A266*
JRY12568	α	can1-100, his3-11,15, leu2-3,112, lys2, trp1-1, ura3-1, hmlα2∆::yEmRFP, hmrα2∆::yEGFP, sir1-Q613*	sir1-Q613*
JRY12569	α	can1-100, his3-11,15, leu2-3,112, lys2, trp1-1, ura3-1, hmlα2∆::yEmRFP, hmrα2∆::yEGFP, sir1-Q536*	sir1-Q536*
JRY12570	α	can1-100, his3-11,15, leu2-3,112, lys2, trp1-1, ura3-1, hmlα2∆::yEmRFP, hmrα2∆::yEGFP, sir1-P23S	sir1-P23S
JRY12571	α	can1-100, his3-11,15, leu2-3,112, lys2, trp1-1, ura3-1, hmlα2∆::yEmRFP, hmrα2∆::yEGFP, sir1-R389K	sir1-R389K
JRY12632	α	can1-100, his3-11,15, leu2-3,112, lys2, trp1-1, ura3-1, hmlα2∆::yEmRFP, hmrα2∆::yEGFP, sir1-W251*	sir1-W251*
Results, part 2: sir2-G436D mutant and characterization
JRY4013	α	can1-100, his3-11, leu2-3,112, trp1-1, ura3-1, lys2
JRY4012	a	can1-100, his3-11, leu2-3,112, trp1-1, ura3-1, lys2
JRY2728	α	his4
JRY2726	a	his4
JRY12669	α	can1-100, his3-11,15/his3-11, leu2-3,112, lys2, trp1-1, ura3-1, sir-2G436D
JRY12667	a	can1-100, his3-11,15/his3-11, leu2-3,112, lys2, trp1-1, ura3-1, sir2-G436D
JRY12633	α/a	can1-100, his3-11,15/his3-11, leu2-3,112, lys2, trp1-1, ura3-1, HML/hmlα2∆::yEmRFP, HMR/hmrα2∆::yEGFP, SIR1/sir1∆::LEU2, SIR2/sir2-G436D
JRY12590	α	can1-100, his3-11,15, leu2-3,112, lys2, trp1-1, ura3-1, hmlα2∆::yEmRFP, hmrα2∆::yEGFP, sir2-G436D-3xV5::KanMX
JRY12589	α	can1-100, his3-11,15, leu2-3,112, lys2, trp1-1, ura3-1, hmlα2∆::yEmRFP, hmrα2∆::yEGFP, SIR2-3xV5::KanMX
JRY12573	α/a	can1-100, his3-11,15, leu2-3,112, lys2, trp1-1, ura3-1, hmlα2∆::yEmRFP, hmrα2∆::yEGFP, SIR1/sir1∆::LEU2, sir2-G436D/SIR2
JRY12572	α/a	can1-100, his3-11,15, leu2-3,112, lys2, trp1-1, ura3-1, hmlα2∆::yEmRFP, hmrα2∆::yEGFP, sir2-G436D/SIR2
JRY12564	α	can1-100, his3-11,15, leu2-3,112, lys2, trp1-1, ura3-1, hmlα2∆::yEmRFP, hmrα2∆::yEGFP, sir2-G436D
JRY12557	α	can1-100, his3-11,15, leu2-3,112, lys2, trp1-1, ura3-1, hmlα2∆::yEmRFP, hmrα2∆::yEGFP, unknown EMS mutations	sir2-G436D
JRY12477	a/α	can1-100, his3-11, 15, leu2-3,112, lys2, trp1-1, ura3-1, hmlα2∆::yEmRFP, hmrα2∆::yEGFP, sir1∆::LEU2/SIR1, unkown EMS mutations/WT	sir2-G436D
JRY12476	a/α	can1-100, his3-11, 15, leu2-3,112, lys2, trp1-1, ura3-1, hmlα2∆::yEmRFP, hmrα2∆::yEGFP, unkown EMS mutations/WT	sir2-G436D
JRY12466	α	can1-100, his3-11, 15, leu2-3,112, lys2, trp1-1, ura3-1, hmlα2∆::yEmRFP, hmrα2∆::yEGFP, unkown EMS mutations	sir2-G436D
JRY12259	α	can1-100, his3-11,15, leu2-3,112, lys2, trp1-1, ura3-1, hmlα2∆::yEmRFP, hmrα2∆::yEGFP, sir2∆::TRP1
JRY12899	α	can1-100, his3-11,15, leu2-3,112, lys2, trp1-1, ura3-1, hmlα2∆::yEmRFP, hmrα2∆::yEGFP, fob1∆::KanMX
JRY12900	α	can1-100, his3-11,15, leu2-3,112, lys2, trp1-1, ura3-1, hmlα2∆::yEmRFP, hmrα2∆::yEGFP, sir1∆::LEU2, fob1∆::KanMX
JRY12901	α	can1-100, his3-11,15, leu2-3,112, lys2, trp1-1, ura3-1, hmlα2∆::yEmRFP, hmrα2∆::yEGFP, sir2-G436D, fob1∆::KanMX	sir2-G436D
JRY12902	α	can1-100, his3-11,15, leu2-3,112, lys2, trp1-1, ura3-1, hmlα2∆::yEmRFP, hmrα2∆::yEGFP, sir2∆::TRP1, fob1∆::KanMX
JRY13197	a	can1-100, his3-11,15, leu2-3,112, lys2, trp1-1, ura3-2, hml∆::NatMX, HMRα, hmrα2∆::GFP, sir2-G436D	sir2-G436D
JRY13198	a	can1-100, his3-11,15, leu2-3,112, lys2, trp1-1, ura3-1, hmlα2∆::RFP, HMRα, hmr∆::HygMX, sir2-G436D	sir2-G436D
JRY13204	α	can1-100, his3-11,15, leu2-3,112, lys2, trp1-1, ura3-1, hmlα2∆::yEmRFP, hmrα2∆::HygMX, RDN37-2::yEGFP::k.lac.URA3
JRY13205	α	can1-100, his3-11,15, leu2-3,112, lys2, trp1-1, ura3-1, hmlα2∆::yEmRFP, hmrα2∆::HygMX, RDN37-2::yEGFP::k.lac.URA3, sir2∆::TRP1
JRY13206	α	can1-100, his3-11,15, leu2-3,112, lys2, trp1-1, ura3-1, hmlα2∆::yEmRFP, hmrα2∆::HygMX, RDN37-2::yEGFP::k.lac.URA3, sir2-G436D	sir2-G436D
JRY13207	α	can1-100, his3-11,15, leu2-3,112, lys2, trp1-1, ura3-1, hmlα2∆::yEmRFP, hmrα2∆::HygMX, RDN37-2::yEGFP::k.lac.URA3, fob1∆::KanMX
JRY13208	α	can1-100, his3-11,15, leu2-3,112, lys2, trp1-1, ura3-1, hmlα2∆::yEmRFP, hmrα2∆::HygMX, RDN37-2::yEGFP::k.lac.URA3, sir2-G436D, fob1∆::KanMX	sir2-G436D

## Sheet: Table S2
Table S2. Plasmids used in this study
Plasmid	Description	Published Source
pJR3428	cas9, URA3, ARS4, KanR	This study, Lee et al. 2015
pJR909	SIR1, URA3, ARS4, AmpR
pJR2025	SIR2, LEU2, ARS4, AmpR
pJR2026	SIR3, LEU2, ARS4, AmpR
pJR2027	SIR4, LEU2, ARS4, AmpR
pJR3190	pFA6a-3xV5-KanMX6, AmpR, ori	Bahler, et al. 1998
pRS426	URA3, AmpR, ori (2 micron)	Christianson et al. 1992
pJR3524	SIR2, URA3, AmpR, ori (2 micron)
pJR3525	sir2-G436D, URA3, AmpR, ori (2 micron)

## Sheet: Table S3
Table S3. Oligonucleotides used in this study.
Name	Sequence (5'-3')
guide RNA sequences used for CRISPR-Cas9 editing
sir1∆::LEU2 junction top	gactttCACCGCATATCGACCGGTCG
sir1∆::LEU2 junction bottom	aaacCGACCGGTCGATATGCGGTGaa
SIR2 top	gactttAGGCCTCCATATATCCTTAA
SIR2 bottom	aaacTTAAGGATATATGGAGGCCTaa
amplification of sir1, sir2 for Cas9 repairs
SIR1 forward	CTAAGAAGCCGGACCTAG
SIR1 reverse	CATGCCATGACGAAATTC
SIR2 forward	TAGTGAGATGGGCGGTACAT
SIR2 reverse	TAGTGAGATGGGCGGTACAT
Sequencing primers for SIR1
SIR1 sequencing 1	GTCTTTAACTCTGATTTCGA
SIR1 sequencing 2	AAGTTTCTGTCAAACAAGTG
SIR1 sequencing 3	AATGGAAAATGGAAAATGCG
Sequencing primers for SIR2
oAD300	TTAGGCATCGCTTCGGTAGA
oVB502	CCCGAGGATTTGAACTCGTTAT
oMB231	GACGGGATCACGATTAATC
oAD303	TAGTGAGATGGGCGGTACAT
creation of V5-tagged Sir2, amplified from pJR3190
Sir2-pFA6a forward	CGTGTATGTCGTTACATCAGATGAACATCCCAAAACCCTCCGGATCCCCGGGTTAATTAA
Sir2-pFA6a reverse	TATTAATTTGGCACTTTTAAATTATTAAATTGCCTTCTACGAATTCGAGCTCGTTTAAAC
Gibson Assembly of pJR3523 and pJR3524
oDF203	aaagcctggggtgcctaatgagtgaggtaaGGTCATTTCTTTTCCAAGCT
oDF204	cgcgttggccgattcattaatgcagctggcTTAAGCTATTTGTGAGAGCC
oDF205	TGCTAGATGTAGCTTGGAAAAGAAATGACCttacctcactcattaggcac
oDF206	AAAGACGCAAGGCTCTCACAAATAGCTTAAgccagctgcattaatgaatc
Deletion of Fob1
oDF184	TTAACGATTGTGTGAGTGTGAATTTGTGCTGAGGATAACAgacatggaggcccagaatac
oDF185	ACCTATGGTGACTCCTCCTTTCATTCTATCCTACATATTAcagtatagcgaccagcattc
Insertion of yEGFP into RDN37
oDS1203	GTTTGAGCGTCATTTCCTTCTCAAACATTCTGTTTGGTAGatgggagaagcaattggaag
oDS1205	GGCCTCACTAAGCCATTCAATCGGTACTAGCGACGGGCGGGACATGGAGGCCCAGAATAC
